# Supplementary figures and images for: Patterns and early evolution of organ failure in the intensive care unit and their relation to outcome
Source: Springer Nature journal article supplement (doi:10.1186/cc11868), 2012-11-16

A

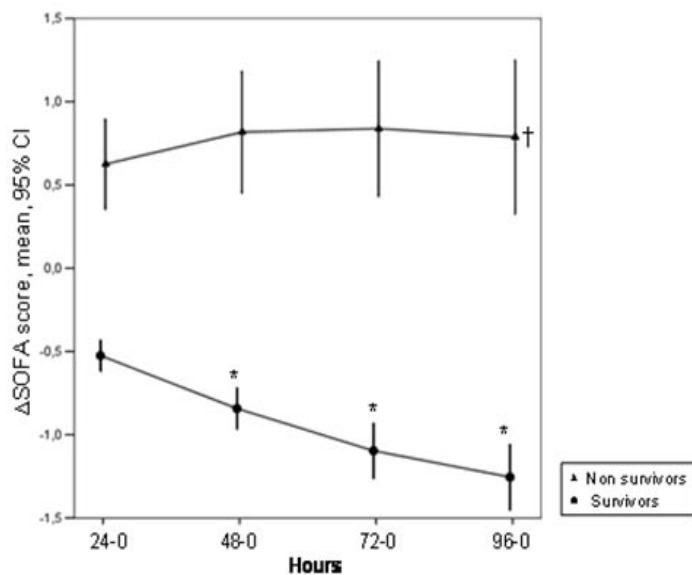

B

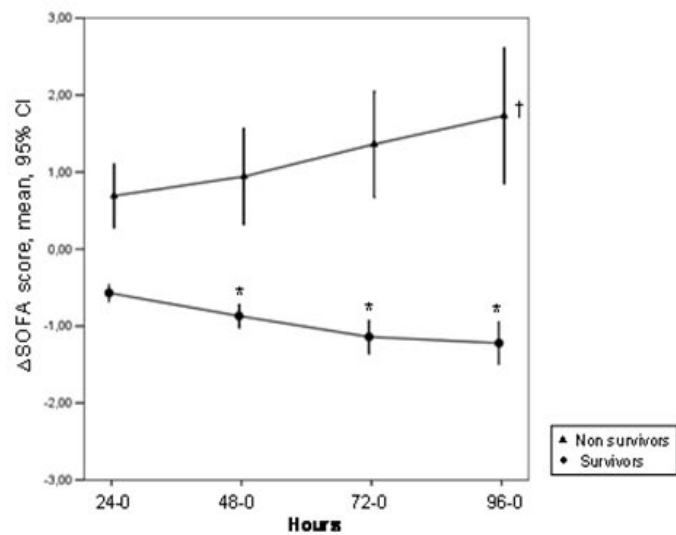

C

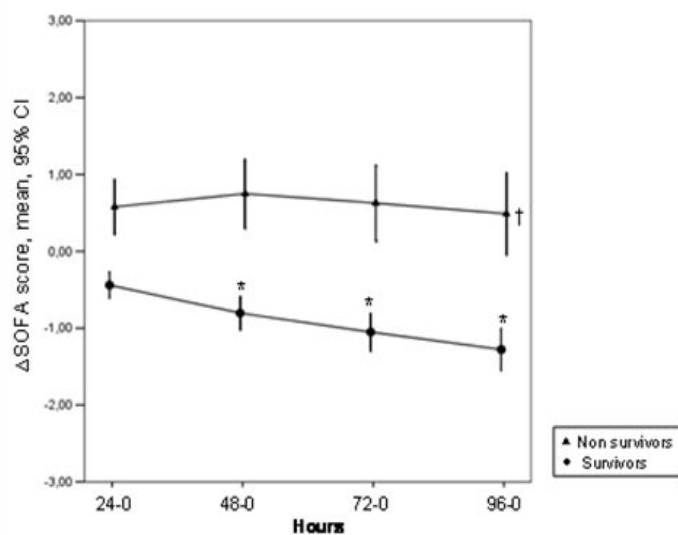

Supplement: 13054_2012_980_MOESM2_ESM.pdf [file 13054_2012_980_MOESM2_ESM.pdf]
